# Supplementary material
Source: publisher figshare collection journal article supplement (https://acs.figshare.com/ndownloader/files/17855990)
Supplement: Supplementary file 1 [file 17855990]

## Supplementary information

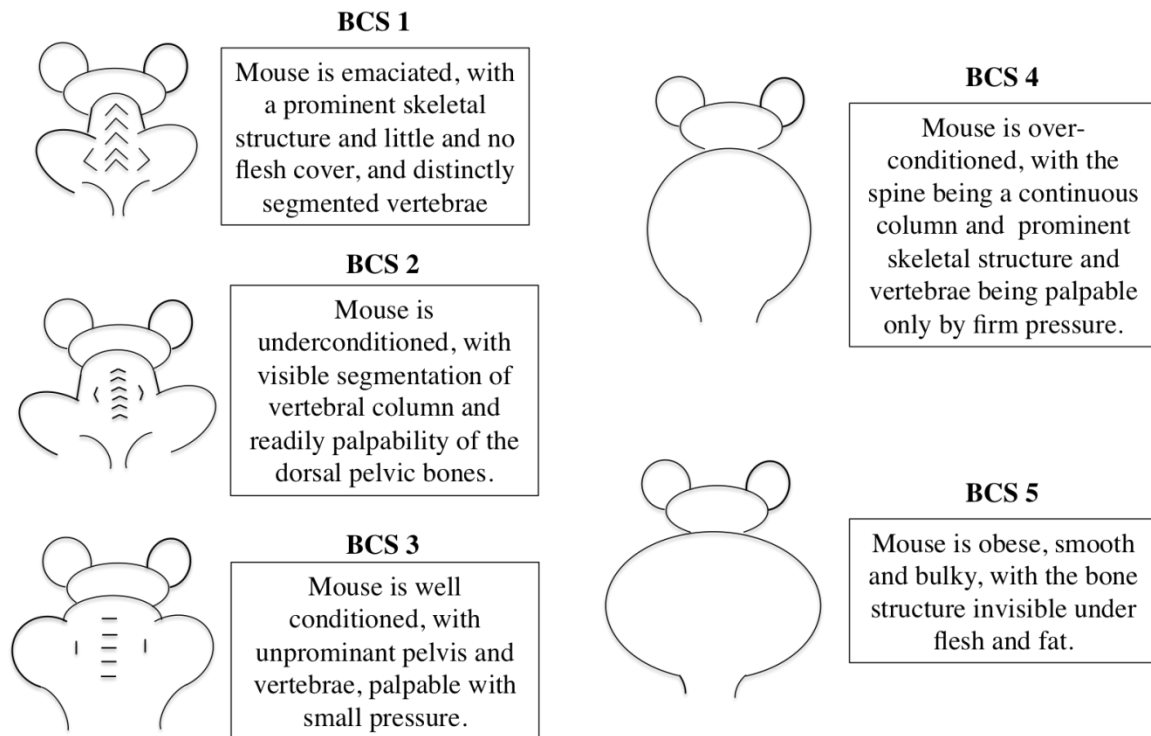

Figure S-1. Body condition score (BCS) based on the system presented by Ullman-Culleré and Foltz

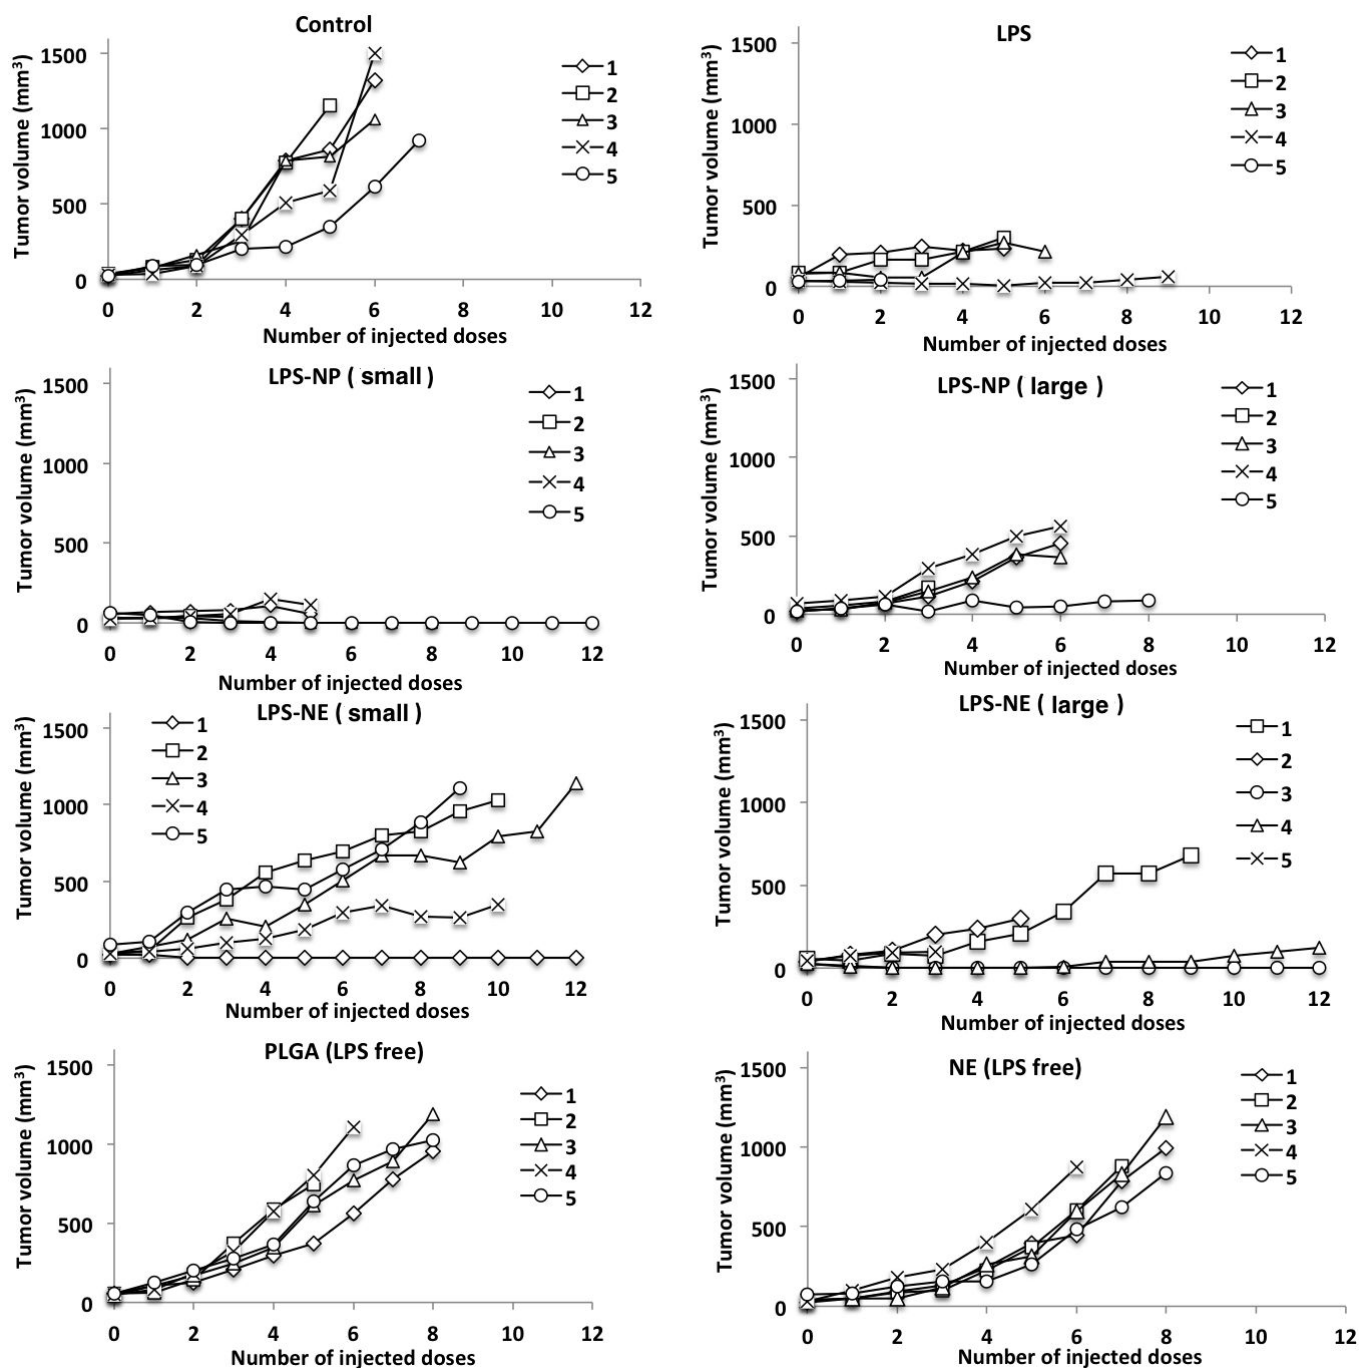

Figure S-2. Tumor volume following the biweekly treatment of C26 tumor-bearing mice with peritumoral injections of different LPS-decorated and LPS free control nanostructures

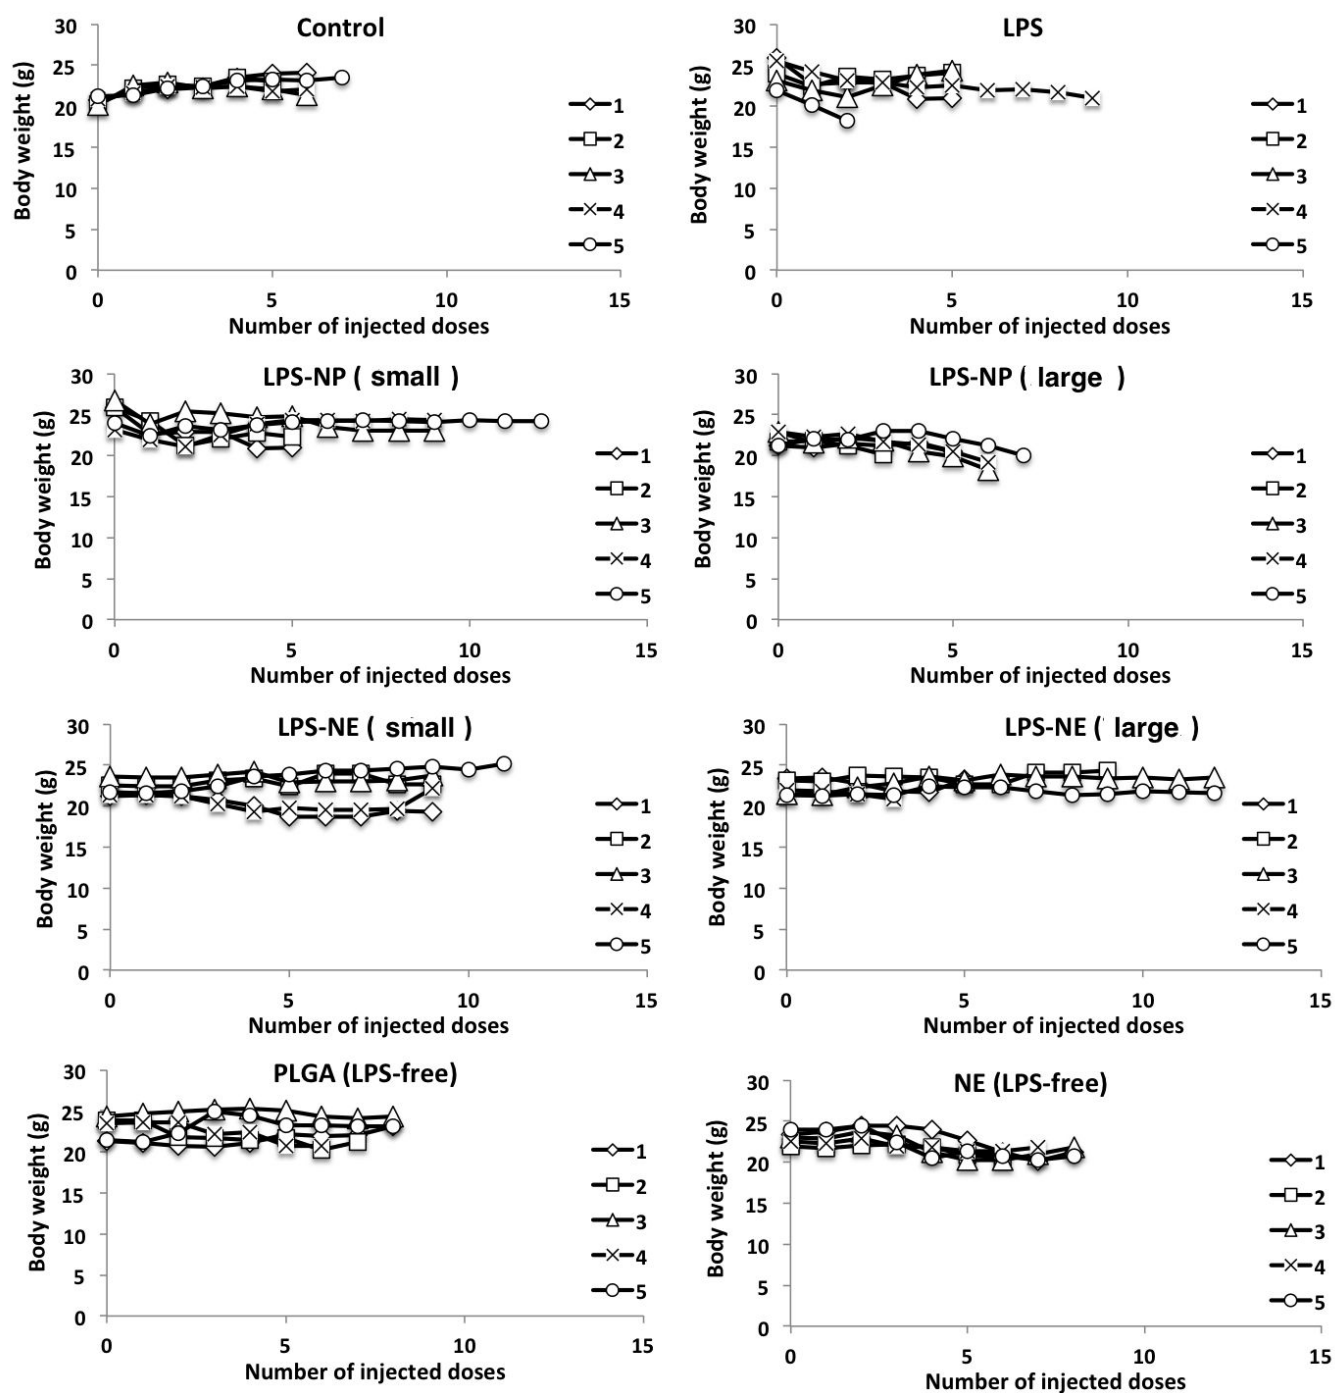

Figure S-3. Animals' weight over the course of the treatment
